# Supplementary material
Source: PubMed Central journal article supplement (PMC3375876)
Supplement: NIHMS353136-supplement-01.pdf [file NIHMS353136-supplement-01.pdf]

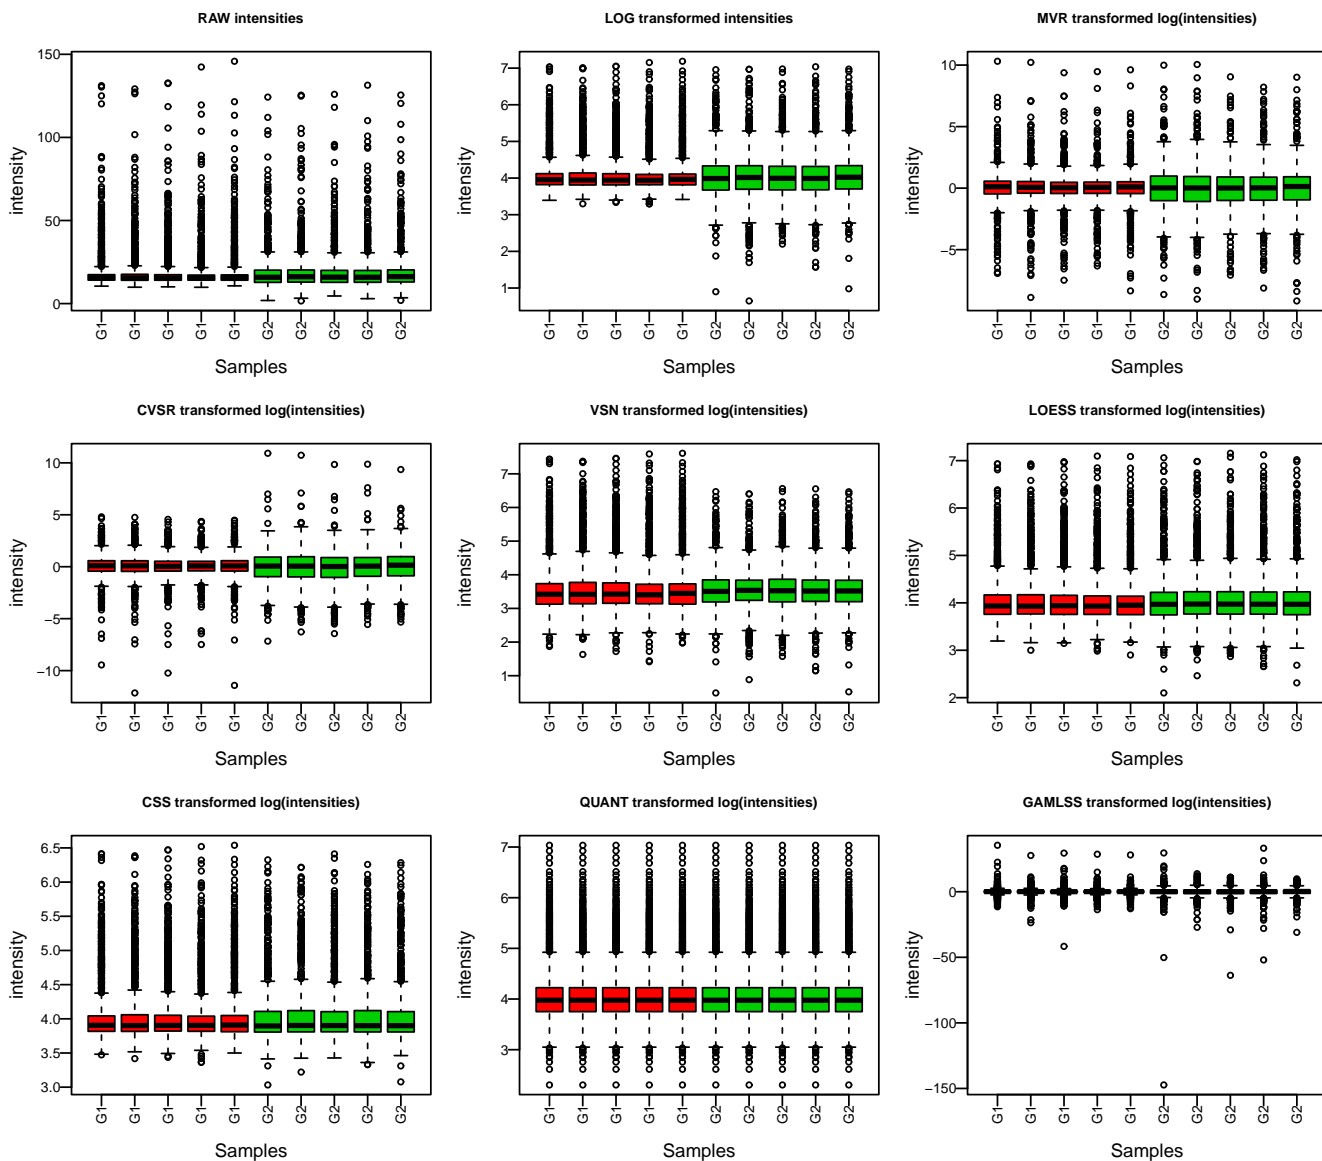

Supplementary Figure 7: Box-whisker plots of intensities by sample and group before and after transformation for the synthetic dataset. Red and green colors refer to the two sample groups. Results are shown for the synthetic dataset from model 14.
