# Supplementary material
Source: PubMed Central journal article supplement (PMC3375876)
Supplement: NIHMS353136-supplement-02.pdf [file NIHMS353136-supplement-02.pdf]

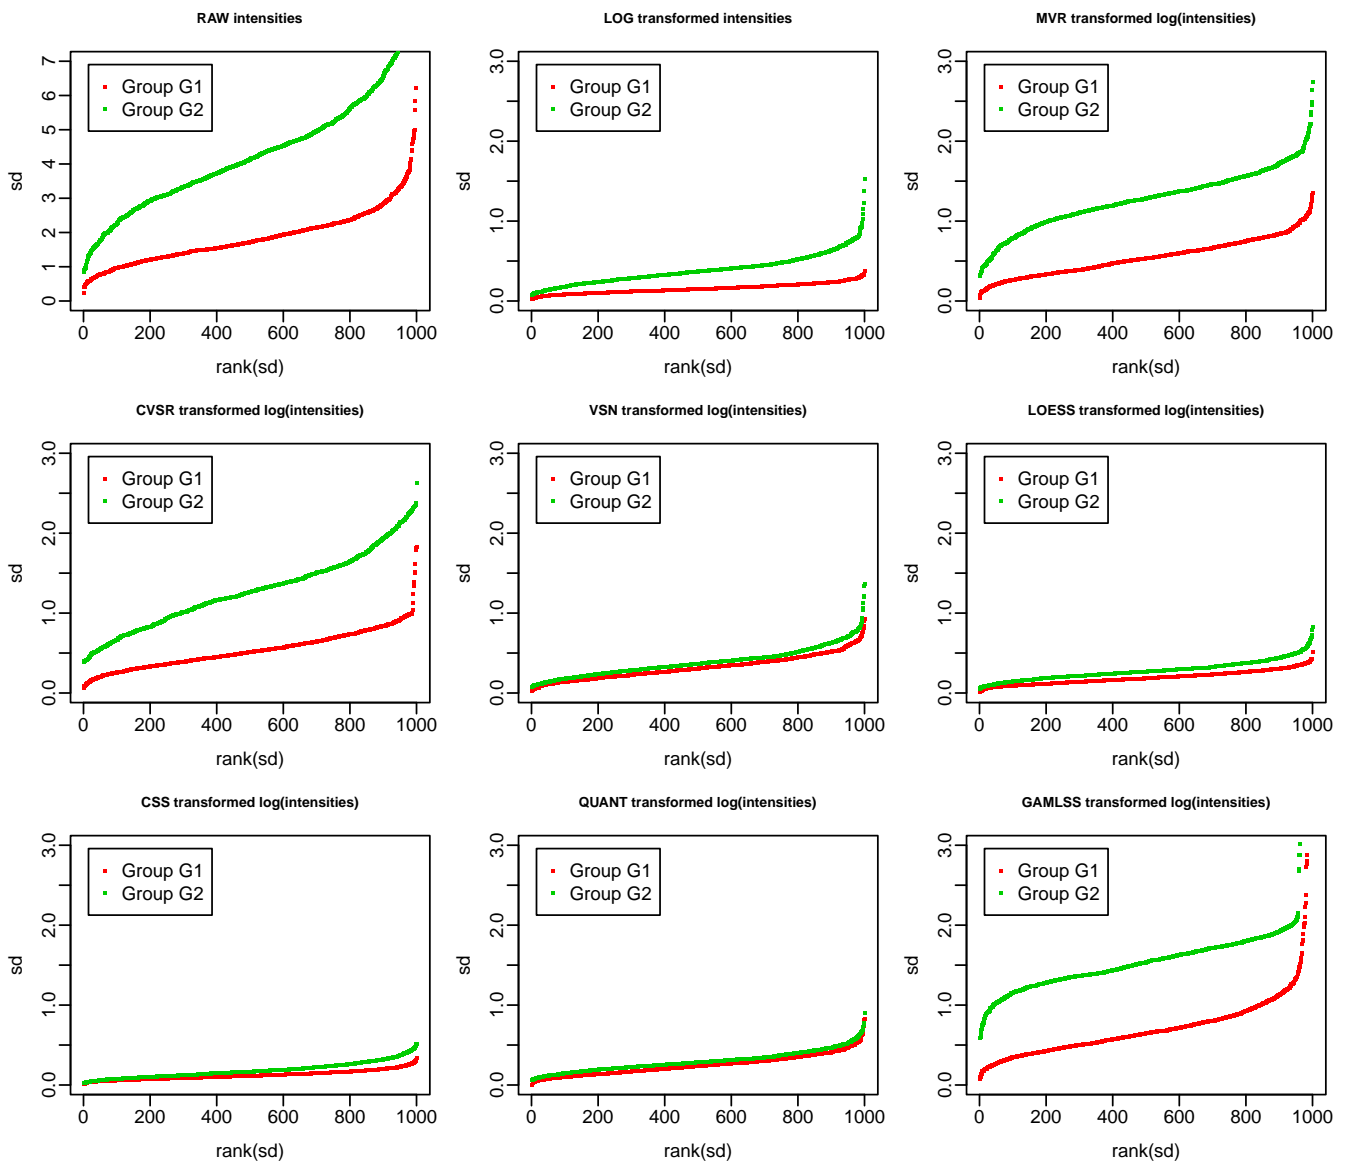

Supplementary Figure 8: Comparative sample group homoscedasticity plots for the synthetic dataset. The sample group standard deviations ( $sd$ ), computed by group, are plotted against their ranks ( $rank(sd)$ ) under various transformations and variance stabilization procedures. Note the difference in scale of the standard deviations in the raw data case as compared to all other transformations (on an identical scale). Results are shown for the synthetic dataset from model 14.
