# Supplementary material
Source: PubMed Central journal article supplement (PMC3375876)
Supplement: NIHMS353136-supplement-03.pdf [file NIHMS353136-supplement-03.pdf]

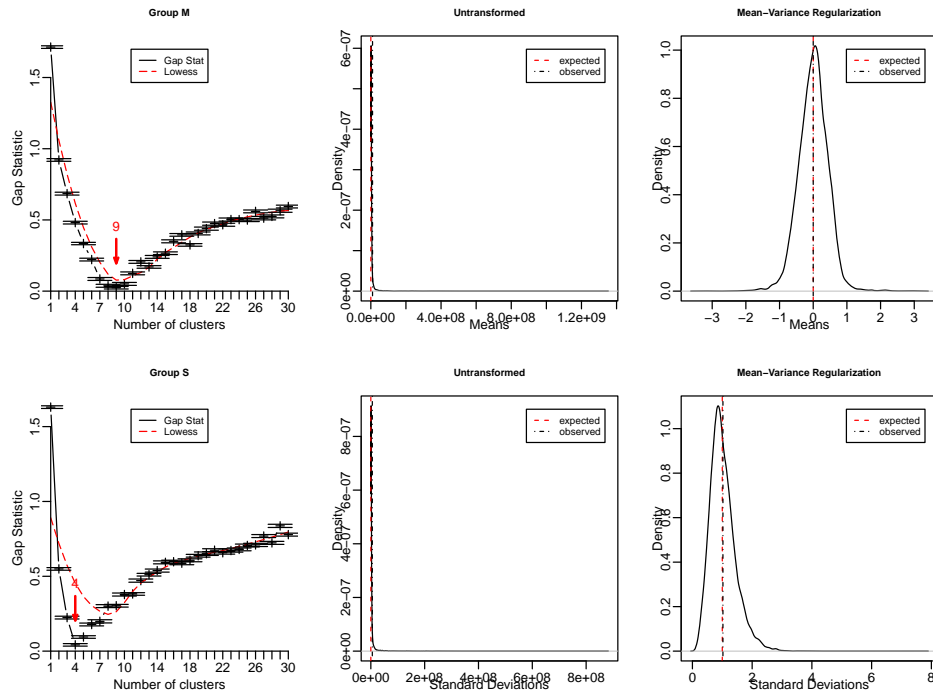

Supplementary Figure 9: First column: similarity statistic profiles giving the estimated number of variable mean-standard deviation clusters by sample group “M” and “S” in the input space of the real proteomics dataset. *K*-Means partitioning clustering algorithm was performed with  $s = 100$  random start seedings. Red arrows indicate results of stopping rule (idem as in Figure 2). Second and Third column: distributions of means and standard deviations before and after multi-group mean-variance regularization for the real proteomics dataset.
