# Supplementary material
Source: PubMed Central journal article supplement (PMC3375876)
Supplement: NIHMS353136-supplement-04.pdf [file NIHMS353136-supplement-04.pdf]

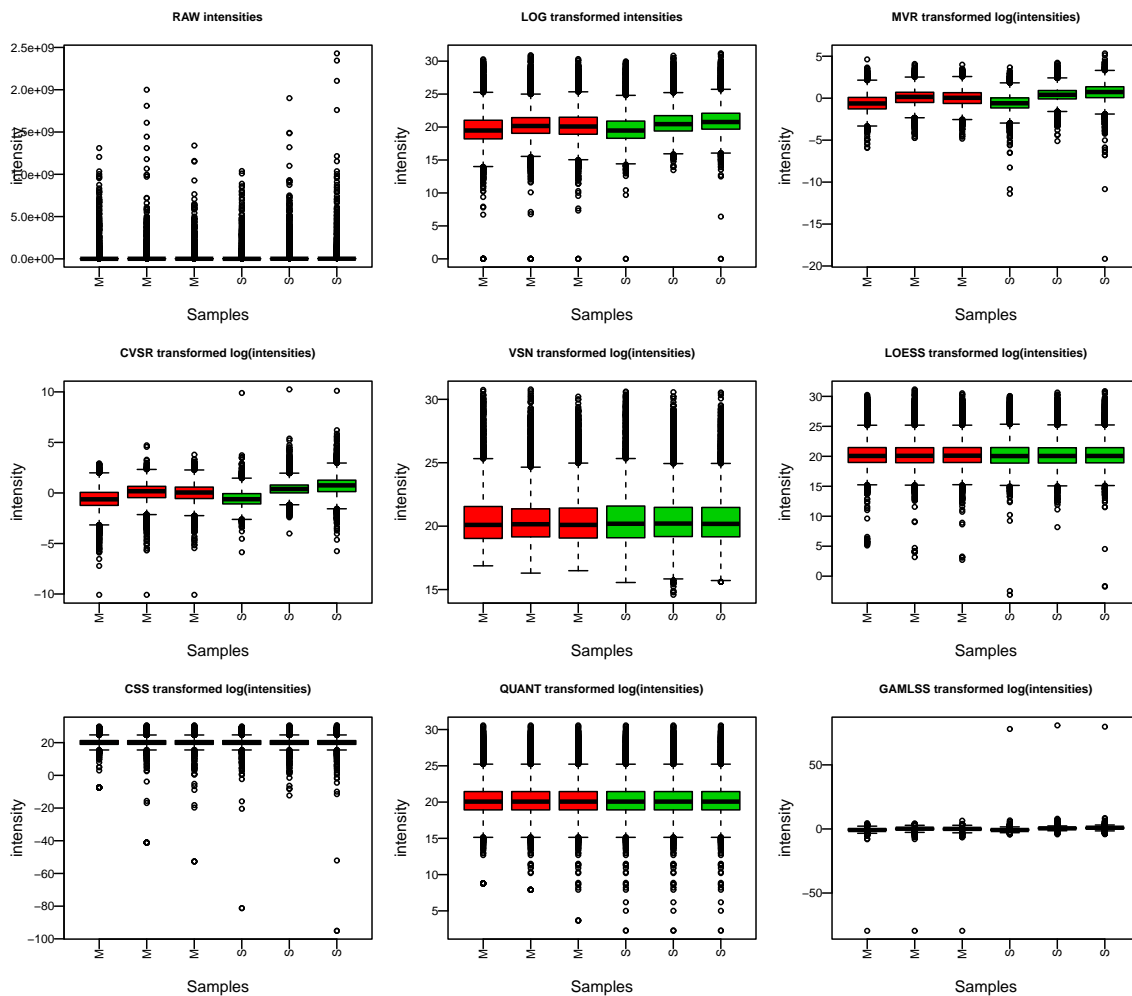

Supplementary Figure 10: *Box-whisker plots of intensities by sample and group before and after transformation for the real proteomics dataset. Red and green colors refer to the two sample groups.*
