# Supplementary material
Source: PubMed Central journal article supplement (PMC3375876)
Supplement: NIHMS353136-supplement-05.pdf [file NIHMS353136-supplement-05.pdf]

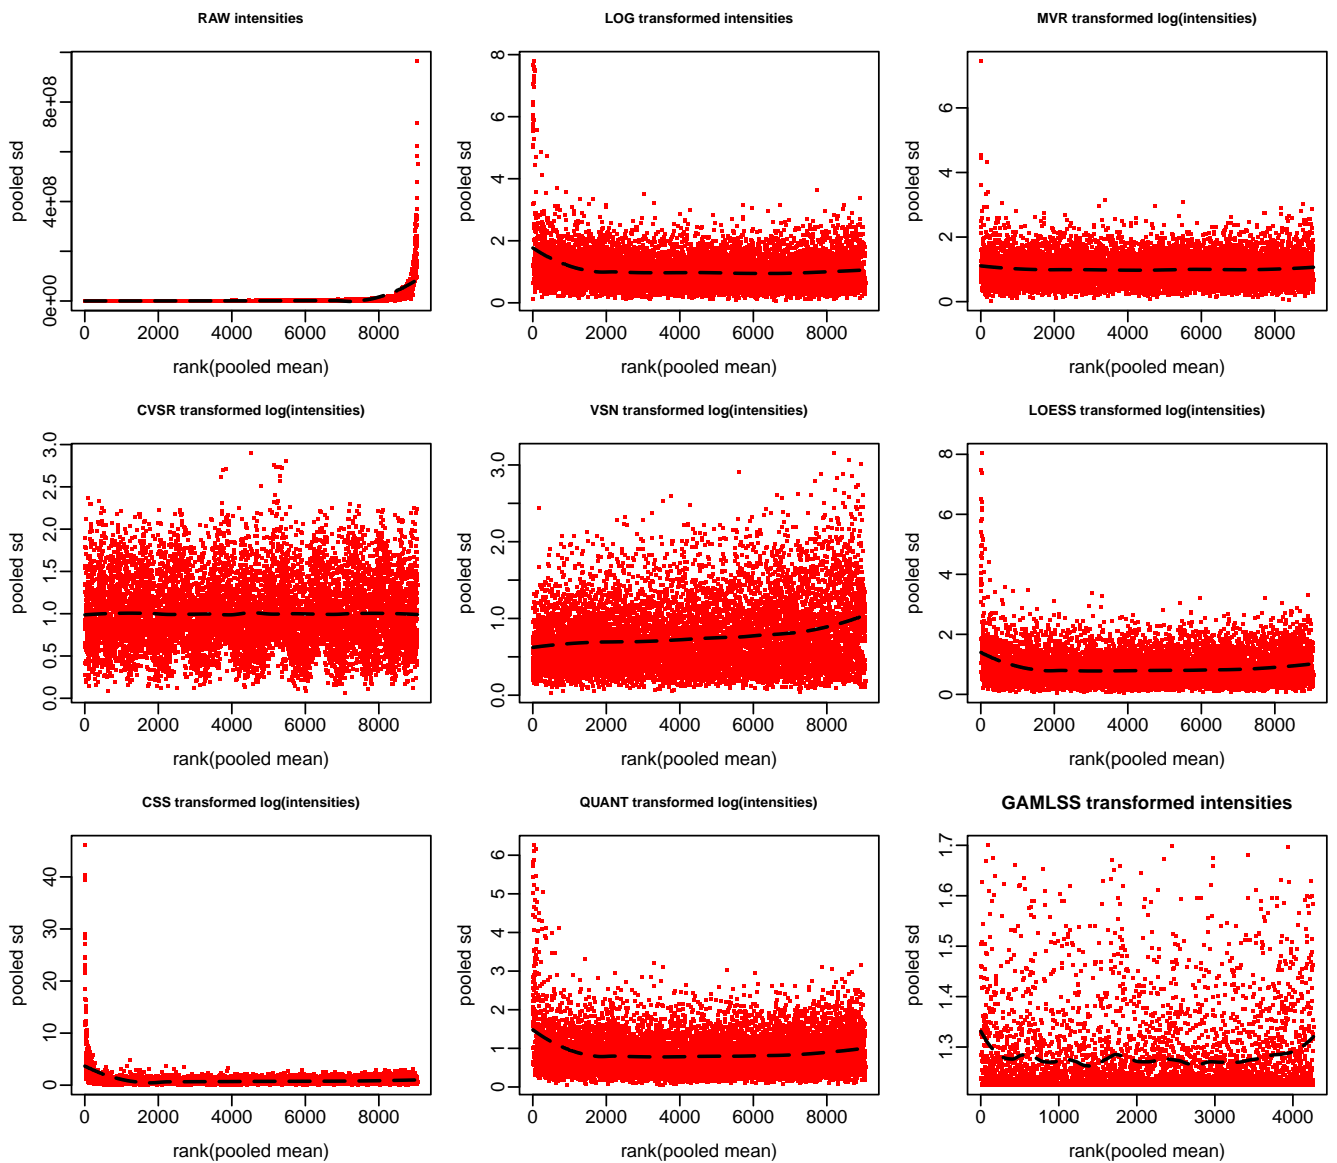

Supplementary Figure 11: Mean-SD scatter-plot for the real proteomics dataset. The pooled sample variances across groups (pooled sd) are plotted against the ranks of pooled sample means across groups (rank(pooled mean)) for each individual variable  $j$  under various transformations and variance stabilization procedures. Black dotted line depicts the running median estimator (equal window-span of 0.3 for all procedures). Note the sharp increase of the standard deviations as a function of the means.
